# Supplementary material for: Crystal structure of the plant symporter STP10 illuminates sugar uptake mechanism in monosaccharide transporter superfamily
Source: PubMed Central journal article supplement (PMC6345825; doi:10.1038/s41467-018-08176-9), 2019-01-24
Supplement: 41467_2018_8176_MOESM2_ESM.pdf [file 41467_2018_8176_MOESM2_ESM.pdf]

## **SUPPLEMENTARY MATERIAL**

### **Crystal structure of the plant symporter STP10 illuminates sugar uptake mechanism in Monosaccharide Transporter Superfamily**

Peter Aasted Paulsen<sup>1</sup>, Tânia F. Custódio<sup>1</sup>, Bjørn Panyella Pedersen<sup>1,2</sup>

*1) Department of Molecular Biology and Genetics, Aarhus University, Gustav Wieds Vej 10, DK-8000 Aarhus C, Denmark.*

*2) Aarhus Institute of Advanced Studies, Aarhus University, Høegh-Guldbergs Gade 6B, DK-8000 Aarhus C, Denmark.*

Crystal  
STP1  
STP2  
STP3  
STP4  
STP5  
STP6  
STP7  
STP8  
STP9  
STP10  
STP11  
STP12  
STP13  
STP14  
PKHUP1

21 30 40 50 60 70

F39 D42 L43

M1a M1b I1 I2

MPA GGFVV . . . . . GDGOKAYPGL V AFV IMTCIVVAAAGCGLL I FGDYD GISSGGVTSMDFFLTKR FFPFV SQMKKAKH . . . . . D 73  
 STP1 VVGSVMNV . . . . . EEGTKAFPAKLL I LGVYFLFCVAAVAGGGLM I FGDYD GISSGGVTSMDFFLTKR FFPFV YEKKHRHH . . . . . T 71  
 STP2 NVA . . . . . FEARKEAMAKSVSGGKLL I YFVVFVASTCVMVAAAGCGLL I FGDYD GISSGGVTSMDFFLTKR FFPFV LQEQEDRRRRRGNSEN 77  
 STP3 MAG GGL . . . . . ALDVSSAGNIDAKM I AVVVMSCIVVAAVAGCGLL I FGDYD GISSGGVTSMDFFLTKR FFPFV YLKKMSAH . . . . . E 70  
 STP4 MAG GGL . . . . . ALDVSSAGNIDAKM I AVVVMSCIVVAAVAGCGLL I FGDYD GISSGGVTSMDFFLTKR FFPFV LKQKASEAK . . . . . T 71  
 STP5 MAV VVS . . . . . NANAPAFDAKMTM I YVYVFCVIMVAAVAGCGLL I FGDYD GISSGGVTSMDFFLTKR FFPFV WERKKKHHV . . . . . E 68  
 STP6 MAG GSF . . . . . PTGVAKERAEQYQGGM I SYVYFICVIVVAAVAGCGLL I FGDYD GISSGGVTSMDFFLTKR FFPFV YEKKKQAH . . . . . E 74  
 STP7 MAG VFS . . . . . NGNSKSYFDAGM I YVYVIMTCIVVAAVAGCGLL I FGDYD GISSGGVTSMDFFLTKR FFPFV YEKKKHAAH . . . . . E 73  
 STP8 MAG GAFVSE . . . . . GGGRSYEGGVT I AFVIMTCIVVAAVAGCGLL I FGDYD GISSGGVTSMDFFLTKR FFPFV YEKKKHAAH . . . . . E 73  
 STP9 MAG GAFVSE . . . . . GGGRSYEGGVT I AFVIMTCIVVAAVAGCGLL I FGDYD GISSGGVTSMDFFLTKR FFPFV YEKKKHAAH . . . . . E 73  
 STP10 MAG GAFVSE . . . . . GGGRSYEGGVT I AFVIMTCIVVAAVAGCGLL I FGDYD GISSGGVTSMDFFLTKR FFPFV YEKKKHAAH . . . . . E 73  
 STP11 MAG GAFVSE . . . . . GGGRSYEGGVT I AFVIMTCIVVAAVAGCGLL I FGDYD GISSGGVTSMDFFLTKR FFPFV YEKKKHAAH . . . . . E 73  
 STP12 MPS VGV I . . . . . GDGKKEYPGL I LYVTVTCIVVAAVAGCGLL I FGDYD GISSGGVTSMDFFLTKR FFPFV YEKKKHAAH . . . . . S 71  
 STP13 MTG GGFAT . . . . . SANGVEFE . . . AKI I TPIVYV I SCIMVAAVAGCGLL I FGDYD GISSGGVTSMDFFLTKR FFPFV YEKKKHAAH . . . . . D 72  
 STP14 MAG GALTDEG . . . . . GLKRAHLYEHR I TSYVIFVAV I VSGM I FGDYD GISSGGVTSMDFFLTKR FFPFV YEKKKHAAH . . . . . E 74  
 PKHUP1 MAG GGVV V . . . . . SGRGLSTGDYRGG I VYVVMVAFMAACGGLL I FGDYD GISSGGVTSMDFFLTKR FFPFV YEKKKHAAH . . . . . D 75

Crystal  
STP1  
STP2  
STP3  
STP4  
STP5  
STP6  
STP7  
STP8  
STP9  
STP10  
STP11  
STP12  
STP13  
STP14  
PKHUP1

80 90 100 110 120 130 140 150

Cys77 R142

TAY QYFDN . . . . . QMLQ LFTSSLYLAAL I VASV FVMSV ITRKGR KRKVS MFI GGLA FCA G A L F N G A F V V S M L I I G R L L L G V G G F A N Q 154  
 STP1 NOY C Q F D S . . . . . D L L Q L F T S S L Y L A A L I F A S L F L A S S Y V S R A F F G R R K V I F L G G V S F F F G A L A L L G S Q E L V M L I I G R L L L G F G G F A N Q 152  
 STP2 NNH C Q F D S . . . . . D L L Q L F T S S L Y L A A L I F A S L F L A S S Y V S R A F F G R R K V I F L G G V S F F F G A L A L L G S Q E L V M L I I G R L L L G F G G F A N Q 151  
 STP3 NNH C Q F D S . . . . . D L L Q L F T S S L Y L A A L I F A S L F L A S S Y V S R A F F G R R K V I F L G G V S F F F G A L A L L G S Q E L V M L I I G R L L L G F G G F A N Q 158  
 STP4 NNH C Q F D S . . . . . D L L Q L F T S S L Y L A A L I F A S L F L A S S Y V S R A F F G R R K V I F L G G V S F F F G A L A L L G S Q E L V M L I I G R L L L G F G G F A N Q 151  
 STP5 NNH C Q F D S . . . . . D L L Q L F T S S L Y L A A L I F A S L F L A S S Y V S R A F F G R R K V I F L G G V S F F F G A L A L L G S Q E L V M L I I G R L L L G F G G F A N Q 152  
 STP6 NNH C Q F D S . . . . . D L L Q L F T S S L Y L A A L I F A S L F L A S S Y V S R A F F G R R K V I F L G G V S F F F G A L A L L G S Q E L V M L I I G R L L L G F G G F A N Q 149  
 STP7 NNH C Q F D S . . . . . D L L Q L F T S S L Y L A A L I F A S L F L A S S Y V S R A F F G R R K V I F L G G V S F F F G A L A L L G S Q E L V M L I I G R L L L G F G G F A N Q 155  
 STP8 NNH C Q F D S . . . . . D L L Q L F T S S L Y L A A L I F A S L F L A S S Y V S R A F F G R R K V I F L G G V S F F F G A L A L L G S Q E L V M L I I G R L L L G F G G F A N Q 150  
 STP9 NNH C Q F D S . . . . . D L L Q L F T S S L Y L A A L I F A S L F L A S S Y V S R A F F G R R K V I F L G G V S F F F G A L A L L G S Q E L V M L I I G R L L L G F G G F A N Q 154  
 STP10 NNH C Q F D S . . . . . D L L Q L F T S S L Y L A A L I F A S L F L A S S Y V S R A F F G R R K V I F L G G V S F F F G A L A L L G S Q E L V M L I I G R L L L G F G G F A N Q 154  
 STP11 NNH C Q F D S . . . . . D L L Q L F T S S L Y L A A L I F A S L F L A S S Y V S R A F F G R R K V I F L G G V S F F F G A L A L L G S Q E L V M L I I G R L L L G F G G F A N Q 152  
 STP12 NNH C Q F D S . . . . . D L L Q L F T S S L Y L A A L I F A S L F L A S S Y V S R A F F G R R K V I F L G G V S F F F G A L A L L G S Q E L V M L I I G R L L L G F G G F A N Q 153  
 STP13 NNH C Q F D S . . . . . D L L Q L F T S S L Y L A A L I F A S L F L A S S Y V S R A F F G R R K V I F L G G V S F F F G A L A L L G S Q E L V M L I I G R L L L G F G G F A N Q 153  
 STP14 NNH C Q F D S . . . . . D L L Q L F T S S L Y L A A L I F A S L F L A S S Y V S R A F F G R R K V I F L G G V S F F F G A L A L L G S Q E L V M L I I G R L L L G F G G F A N Q 155  
 PKHUP1 SP Y K Y D N . . . . . Q L L Q L F T S S L Y L A A L I F A S L F L A S S Y V S R A F F G R R K V I F L G G V S F F F G A L A L L G S Q E L V M L I I G R L L L G F G G F A N Q 156

Crystal  
STP1  
STP2  
STP3  
STP4  
STP5  
STP6  
STP7  
STP8  
STP9  
STP10  
STP11  
STP12  
STP13  
STP14  
PKHUP1

160 170 180 190 200 210 220 230

Q177 I184 M6 SP motif

STP VYLSLSEMA HAK I R G A L N I G F O M A I T I G I L I A N L I Y G T S K M A Q H . G W R V S L G L A A P A V V M V I G S F V L D I T N S M L E . . . . . 232  
 STP1 AV P L Y L S E M A P A K Y R G A L N I G F O M A I T I G I L I A N L I Y G T S K M A Q H . G W R V S L G L A A P A V V M V I G S F V L D I T N S M L E . . . . . 231  
 STP2 AV P L Y L S E M A P A K Y R G A L N I G F O M A I T I G I L I A N L I Y G T S K M A Q H . G W R V S L G L A A P A V V M V I G S F V L D I T N S M L E . . . . . 228  
 STP3 AV P L Y L S E M A P A K Y R G A L N I G F O M A I T I G I L I A N L I Y G T S K M A Q H . G W R V S L G L A A P A V V M V I G S F V L D I T N S M L E . . . . . 235  
 STP4 AV P L Y L S E M A P A K Y R G A L N I G F O M A I T I G I L I A N L I Y G T S K M A Q H . G W R V S L G L A A P A V V M V I G S F V L D I T N S M L E . . . . . 230  
 STP5 AV P L Y L S E M A P A K Y R G A L N I G F O M A I T I G I L I A N L I Y G T S K M A Q H . G W R V S L G L A A P A V V M V I G S F V L D I T N S M L E . . . . . 227  
 STP6 AV P L Y L S E M A P A K Y R G A L N I G F O M A I T I G I L I A N L I Y G T S K M A Q H . G W R V S L G L A A P A V V M V I G S F V L D I T N S M L E . . . . . 233  
 STP7 AV P L Y L S E M A P A K Y R G A L N I G F O M A I T I G I L I A N L I Y G T S K M A Q H . G W R V S L G L A A P A V V M V I G S F V L D I T N S M L E . . . . . 228  
 STP8 AV P L Y L S E M A P A K Y R G A L N I G F O M A I T I G I L I A N L I Y G T S K M A Q H . G W R V S L G L A A P A V V M V I G S F V L D I T N S M L E . . . . . 232  
 STP9 AV P L Y L S E M A P A K Y R G A L N I G F O M A I T I G I L I A N L I Y G T S K M A Q H . G W R V S L G L A A P A V V M V I G S F V L D I T N S M L E . . . . . 232  
 STP10 AV P L Y L S E M A P A K Y R G A L N I G F O M A I T I G I L I A N L I Y G T S K M A Q H . G W R V S L G L A A P A V V M V I G S F V L D I T N S M L E . . . . . 233  
 STP11 AV P L Y L S E M A P A K Y R G A L N I G F O M A I T I G I L I A N L I Y G T S K M A Q H . G W R V S L G L A A P A V V M V I G S F V L D I T N S M L E . . . . . 229  
 STP12 AV P L Y L S E M A P A K Y R G A L N I G F O M A I T I G I L I A N L I Y G T S K M A Q H . G W R V S L G L A A P A V V M V I G S F V L D I T N S M L E . . . . . 232  
 STP13 AV P L Y L S E M A P A K Y R G A L N I G F O M A I T I G I L I A N L I Y G T S K M A Q H . G W R V S L G L A A P A V V M V I G S F V L D I T N S M L E . . . . . 233  
 STP14 AV P L Y L S E M A P A K Y R G A L N I G F O M A I T I G I L I A N L I Y G T S K M A Q H . G W R V S L G L A A P A V V M V I G S F V L D I T N S M L E . . . . . 233  
 PKHUP1 AV P L Y L S E M A P A K Y R G A L N I G F O M A I T I G I L I A N L I Y G T S K M A Q H . G W R V S L G L A A P A V V M V I G S F V L D I T N S M L E . . . . . 233

Crystal  
STP1  
STP2  
STP3  
STP4  
STP5  
STP6  
STP7  
STP8  
STP9  
STP10  
STP11  
STP12  
STP13  
STP14  
PKHUP1

240 250 260 270 280 290 300 310

IC2 IC3 IC4 M7a Q295-6 N301 M7b

RGKNEEGKFA RKRTRGV . . . . . DINDAEYESTVH A C S E L A . . . . . S Q Y K D P Y R K L . L K P A S R P P F F I . G M L L Q L F Q O O F T G I N I A T I F Y A P V 309  
 STP1 RQHEEARTKTRRIRG . . . . . DNDVDEEEDLVAEAKES . . . . . K K S E T H P W K N I . M E R R K R P A L I F C S A I P P F F Q O O F T G I N I V M F Y A P V 308  
 STP2 RQHEEARTKTRRIRG . . . . . DNDVDEEEDLVAEAKES . . . . . K K S E T H P W K N I . M E R R K R P A L I F C S A I P P F F Q O O F T G I N I V M F Y A P V 306  
 STP3 RQHEEARTKTRRIRG . . . . . DNDVDEEEDLVAEAKES . . . . . K K S E T H P W K N I . M E R R K R P A L I F C S A I P P F F Q O O F T G I N I V M F Y A P V 313  
 STP4 RQHEEARTKTRRIRG . . . . . DNDVDEEEDLVAEAKES . . . . . K K S E T H P W K N I . M E R R K R P A L I F C S A I P P F F Q O O F T G I N I V M F Y A P V 307  
 STP5 RQHEEARTKTRRIRG . . . . . DNDVDEEEDLVAEAKES . . . . . K K S E T H P W K N I . M E R R K R P A L I F C S A I P P F F Q O O F T G I N I V M F Y A P V 311  
 STP6 RQHEEARTKTRRIRG . . . . . DNDVDEEEDLVAEAKES . . . . . K K S E T H P W K N I . M E R R K R P A L I F C S A I P P F F Q O O F T G I N I V M F Y A P V 304  
 STP7 RQHEEARTKTRRIRG . . . . . DNDVDEEEDLVAEAKES . . . . . K K S E T H P W K N I . M E R R K R P A L I F C S A I P P F F Q O O F T G I N I V M F Y A P V 310  
 STP8 RQHEEARTKTRRIRG . . . . . DNDVDEEEDLVAEAKES . . . . . K K S E T H P W K N I . M E R R K R P A L I F C S A I P P F F Q O O F T G I N I V M F Y A P V 305  
 STP9 RQHEEARTKTRRIRG . . . . . DNDVDEEEDLVAEAKES . . . . . K K S E T H P W K N I . M E R R K R P A L I F C S A I P P F F Q O O F T G I N I V M F Y A P V 310  
 STP10 RQHEEARTKTRRIRG . . . . . DNDVDEEEDLVAEAKES . . . . . K K S E T H P W K N I . M E R R K R P A L I F C S A I P P F F Q O O F T G I N I V M F Y A P V 309  
 STP11 RQHEEARTKTRRIRG . . . . . DNDVDEEEDLVAEAKES . . . . . K K S E T H P W K N I . M E R R K R P A L I F C S A I P P F F Q O O F T G I N I V M F Y A P V 310  
 STP12 RQHEEARTKTRRIRG . . . . . DNDVDEEEDLVAEAKES . . . . . K K S E T H P W K N I . M E R R K R P A L I F C S A I P P F F Q O O F T G I N I V M F Y A P V 306  
 STP13 RQHEEARTKTRRIRG . . . . . DNDVDEEEDLVAEAKES . . . . . K K S E T H P W K N I . M E R R K R P A L I F C S A I P P F F Q O O F T G I N I V M F Y A P V 309  
 STP14 RQHEEARTKTRRIRG . . . . . DNDVDEEEDLVAEAKES . . . . . K K S E T H P W K N I . M E R R K R P A L I F C S A I P P F F Q O O F T G I N I V M F Y A P V 311  
 PKHUP1 RQHEEARTKTRRIRG . . . . . DNDVDEEEDLVAEAKES . . . . . K K S E T H P W K N I . M E R R K R P A L I F C S A I P P F F Q O O F T G I N I V M F Y A P V 312

Crystal  
STP1  
STP2  
STP3  
STP4  
STP5  
STP6  
STP7  
STP8  
STP9  
STP10  
STP11  
STP12  
STP13  
STP14  
PKHUP1

310 320 330 340 350 360 370 380

N332 M9 M10

LFKTLGFGDDASLMSAVITGVV . . . . . MLSTFVSIYGVDRYGRRLFLFEGG I O M F I C O A V V A A C I G A K F G V D G T P G E L . . . . . P K W Y A I 388  
 STP1 LFNTMIGFDDASLMSAVITGVV . . . . . MLSTFVSIYGVDRYGRRLFLFEGG I O M F I C O A V V A A C I G A K F G V D G T P G E L . . . . . P K W Y A I 388  
 STP2 LFNTMIGFDDASLMSAVITGVV . . . . . MLSTFVSIYGVDRYGRRLFLFEGG I O M F I C O A V V A A C I G A K F G V D G T P G E L . . . . . P K W Y A I 364  
 STP3 LFNTMIGFDDASLMSAVITGVV . . . . . MLSTFVSIYGVDRYGRRLFLFEGG I O M F I C O A V V A A C I G A K F G V D G T P G E L . . . . . P K W Y A I 390  
 STP4 LFNTMIGFDDASLMSAVITGVV . . . . . MLSTFVSIYGVDRYGRRLFLFEGG I O M F I C O A V V A A C I G A K F G V D G T P G E L . . . . . P K W Y A I 386  
 STP5 LFNTMIGFDDASLMSAVITGVV . . . . . MLSTFVSIYGVDRYGRRLFLFEGG I O M F I C O A V V A A C I G A K F G V D G T P G E L . . . . . P K W Y A I 390  
 STP6 LFNTMIGFDDASLMSAVITGVV . . . . . MLSTFVSIYGVDRYGRRLFLFEGG I O M F I C O A V V A A C I G A K F G V D G T P G E L . . . . . P K W Y A I 381  
 STP7 LFNTMIGFDDASLMSAVITGVV . . . . . MLSTFVSIYGVDRYGRRLFLFEGG I O M F I C O A V V A A C I G A K F G V D G T P G E L . . . . . P K W Y A I 387  
 STP8 LFNTMIGFDDASLMSAVITGVV . . . . . MLSTFVSIYGVDRYGRRLFLFEGG I O M F I C O A V V A A C I G A K F G V D G T P G E L . . . . . P K W Y A I 382  
 STP9 LFNTMIGFDDASLMSAVITGVV . . . . . MLSTFVSIYGVDRYGRRLFLFEGG I O M F I C O A V V A A C I G A K F G V D G T P G E L . . . . . P K W Y A I 389  
 STP10 LFNTMIGFDDASLMSAVITGVV . . . . . MLSTFVSIYGVDRYGRRLFLFEGG I O M F I C O A V V A A C I G A K F G V D G T P G E L . . . . . P K W Y A I 388  
 STP11 LFNTMIGFDDASLMSAVITGVV . . . . . MLSTFVSIYGVDRYGRRLFLFEGG I O M F I C O A V V A A C I G A K F G V D G T P G E L . . . . . P K W Y A I 388  
 STP12 LFNTMIGFDDASLMSAVITGVV . . . . . MLSTFVSIYGVDRYGRRLFLFEGG I O M F I C O A V V A A C I G A K F G V D G T P G E L . . . . . P K W Y A I 386  
 STP13 LFNTMIGFDDASLMSAVITGVV . . . . . MLSTFVSIYGVDRYGRRLFLFEGG I O M F I C O A V V A A C I G A K F G V D G T P G E L . . . . . P K W Y A I 387  
 STP14 LFNTMIGFDDASLMSAVITGVV . . . . . MLSTFVSIYGVDRYGRRLFLFEGG I O M F I C O A V V A A C I G A K F G V D G T P G E L . . . . . P K W Y A I 388  
 PKHUP1 LFNTMIGFDDASLMSAVITGVV . . . . . MLSTFVSIYGVDRYGRRLFLFEGG I O M F I C O A V V A A C I G A K F G V D G T P G E L . . . . . P K W Y A I 391

Crystal  
STP1  
STP2  
STP3  
STP4  
STP5  
STP6  
STP7  
STP8  
STP9  
STP10  
STP11  
STP12  
STP13  
STP14  
PKHUP1

390 400 410 420 430 440 450 460 470

M10a M10b N433 T437 Cys449 M12

WILAFICLVYAGFAWSWGLPWGLV . . . . . PSEICPLERSPAGQAINVSWMFFFTFLTAQGFLLTMLHLKFGFLVYFFASMVAVMTVVF 469  
 STP1 VVVFICLVYAGFAWSWGLPWGLV . . . . . PSEICPLERSPAGQAINVSWMFFFTFLTAQGFLLTMLHLKFGFLVYFFASMVAVMTVVF 469  
 STP2 VVVFICLVYAGFAWSWGLPWGLV . . . . . PSEICPLERSPAGQAINVSWMFFFTFLTAQGFLLTMLHLKFGFLVYFFASMVAVMTVVF 465  
 STP3 VVVFICLVYAGFAWSWGLPWGLV . . . . . PSEICPLERSPAGQAINVSWMFFFTFLTAQGFLLTMLHLKFGFLVYFFASMVAVMTVVF 467  
 STP4 VVVFICLVYAGFAWSWGLPWGLV . . . . . PSEICPLERSPAGQAINVSWMFFFTFLTAQGFLLTMLHLKFGFLVYFFASMVAVMTVVF 471  
 STP5 VVVFICLVYAGFAWSWGLPWGLV . . . . . PSEICPLERSPAGQAINVSWMFFFTFLTAQGFLLTMLHLKFGFLVYFFASMVAVMTVVF 471  
 STP6 VVVFICLVYAGFAWSWGLPWGLV . . . . . PSEICPLERSPAGQAINVSWMFFFTFLTAQGFLLTMLHLKFGFLVYFFASMVAVMTVVF 462  
 STP7 VVVFICLVYAGFAWSWGLPWGLV . . . . . PSEICPLERSPAGQAINVSWMFFFTFLTAQGFLLTMLHLKFGFLVYFFASMVAVMTVVF 468  
 STP8 VVVFICLVYAGFAWSWGLPWGLV . . . . . PSEICPLERSPAGQAINVSWMFFFTFLTAQGFLLTMLHLKFGFLVYFFASMVAVMTVVF 463  
 STP9 VVVFICLVYAGFAWSWGLPWGLV . . . . . PSEICPLERSPAGQAINVSWMFFFTFLTAQGFLLTMLHLKFGFLVYFFASMVAVMTVVF 470  
 STP10 VVVFICLVYAGFAWSWGLPWGLV . . . . . PSEICPLERSPAGQAINVSWMFFFTFLTAQGFLLTMLHLKFGFLVYFFASMVAVMTVVF 469  
 STP11 VVVFICLVYAGFAWSWGLPWGLV . . . . . PSEICPLERSPAGQAINVSWMFFFTFLTAQGFLLTMLHLKFGFLVYFFASMVAVMTVVF 470  
 STP12 VVVFICLVYAGFAWSWGLPWGLV . . . . . PSEICPLERSPAGQAINVSWMFFFTFLTAQGFLLTMLHLKFGFLVYFFASMVAVMTVVF 467  
 STP13 VVVFICLVYAGFAWSWGLPWGLV . . . . . PSEICPLERSPAGQAINVSWMFFFTFLTAQGFLLTMLHLKFGFLVYFFASMVAVMTVVF 468  
 STP14 VVVFICLVYAGFAWSWGLPWGLV . . . . . PSEICPLERSPAGQAINVSWMFFFTFLTAQGFLLTMLHLKFGFLVYFFASMVAVMTVVF 469  
 PKHUP1 GILAVICTFTSGFAWSWGLPWGLV . . . . . PSEICPLERSPAGQAINVSWMFFFTFLTAQGFLLTMLHLKFGFLVYFFASMVAVMTVVF 472

Crystal  
STP1  
STP2  
STP3  
STP4  
STP5  
STP6  
STP7  
STP8  
STP9  
STP10  
STP11  
STP12  
STP13  
STP14  
PKHUP1

470 480 490 500

SP motif ICS ER export signal

VYFLPETKGVPIIEEMGRVYIKQ . . . . . RYKYPEDA IGG . . . . . 507  
 STP1 VYFLPETKGVPIIEEMGRVYIKQ . . . . . RYKYPEDA IGG . . . . . 522  
 STP2 VYFLPETKGVPIIEEMGRVYIKQ . . . . . RYKYPEDA IGG . . . . . 498  
 STP3 VYFLPETKGVPIIEEMGRVYIKQ . . . . . RYKYPEDA IGG . . . . . 514  
 STP4 VYFLPETKGVPIIEEMGRVYIKQ . . . . . RYKYPEDA IGG . . . . . 514  
 STP5 VYFLPETKGVPIIEEMGRVYIKQ . . . . . RYKYPEDA IGG . . . . . 506  
 STP6 VYFLPETKGVPIIEEMGRVYIKQ . . . . . RYKYPEDA IGG . . . . . 507  
 STP7 VYFLPETKGVPIIEEMGRVYIKQ . . . . . RYKYPEDA IGG . . . . . 513  
 STP8 VYFLPETKGVPIIEEMGRVYIKQ . . . . . RYKYPEDA IGG . . . . . 507  
 STP9 VYFLPETKGVPIIEEMGRVYIKQ . . . . . RYKYPEDA IGG . . . . . 517  
 STP10 VYFLPETKGVPIIEEMGRVYIKQ . . . . . RYKYPEDA IGG . . . . . 514  
 STP11 VYFLPETKGVPIIEEMGRVYIKQ . . . . . RYKYPEDA IGG . . . . . 514  
 STP12 VYFLPETKGVPIIEEMGRVYIKQ . . . . . RYKYPEDA IGG . . . . . 508  
 STP13 VYFLPETKGVPIIEEMGRVYIKQ . . . . . RYKYPEDA IGG . . . . . 526  
 STP14 VYFLPETKGVPIIEEMGRVYIKQ . . . . . RYKYPEDA IGG . . . . . 504  
 PKHUP1 VYFLPETKGVPIIEEMGRVYIKQ . . . . . RYKYPEDA IGG . . . . . 534

**Supplementary Figure 1. Multiple sequence alignment of the *A. thaliana* Sugar Transport Family, with *Parachlorella kessleri* HUP1 included.** Alignment between STP1 (accession number P23586), STP2 (accession number Q9LNV3), STP3 (accession number Q8L7R8), STP4 (accession number Q39228), STP5 (accession number Q93Y91), STP6 (accession number Q9SFG0), STP7 (accession number O04249), STP8 (accession number Q9SBA7), STP9 (accession number Q9SX48), STP10 (accession number Q9LT15), STP11 (accession number Q9FMX3), STP12 (accession number O65413), STP13 (accession number Q94AZ2), STP14 (accession number Q8GW61), *Parachlorella kessleri* HUP1 (accession number P15686). Conserved residues are highlighted with gray-scale, where black is perfectly conserved. Colored tubes represent  $\alpha$ -helices found in the N domain (blue), Lid domain (orange), ICH domain (pale yellow) and C domain (green). Key residues are numbered above the  $\alpha$ -helix markings. Residues highlighted in dark red participate in sugar binding. The proton donor/acceptor pair is highlighted in green. The cysteines forming the disulfide bridge between Lid domain and C domain are highlighted in dark yellow. Conserved motifs are highlighted in light blue.

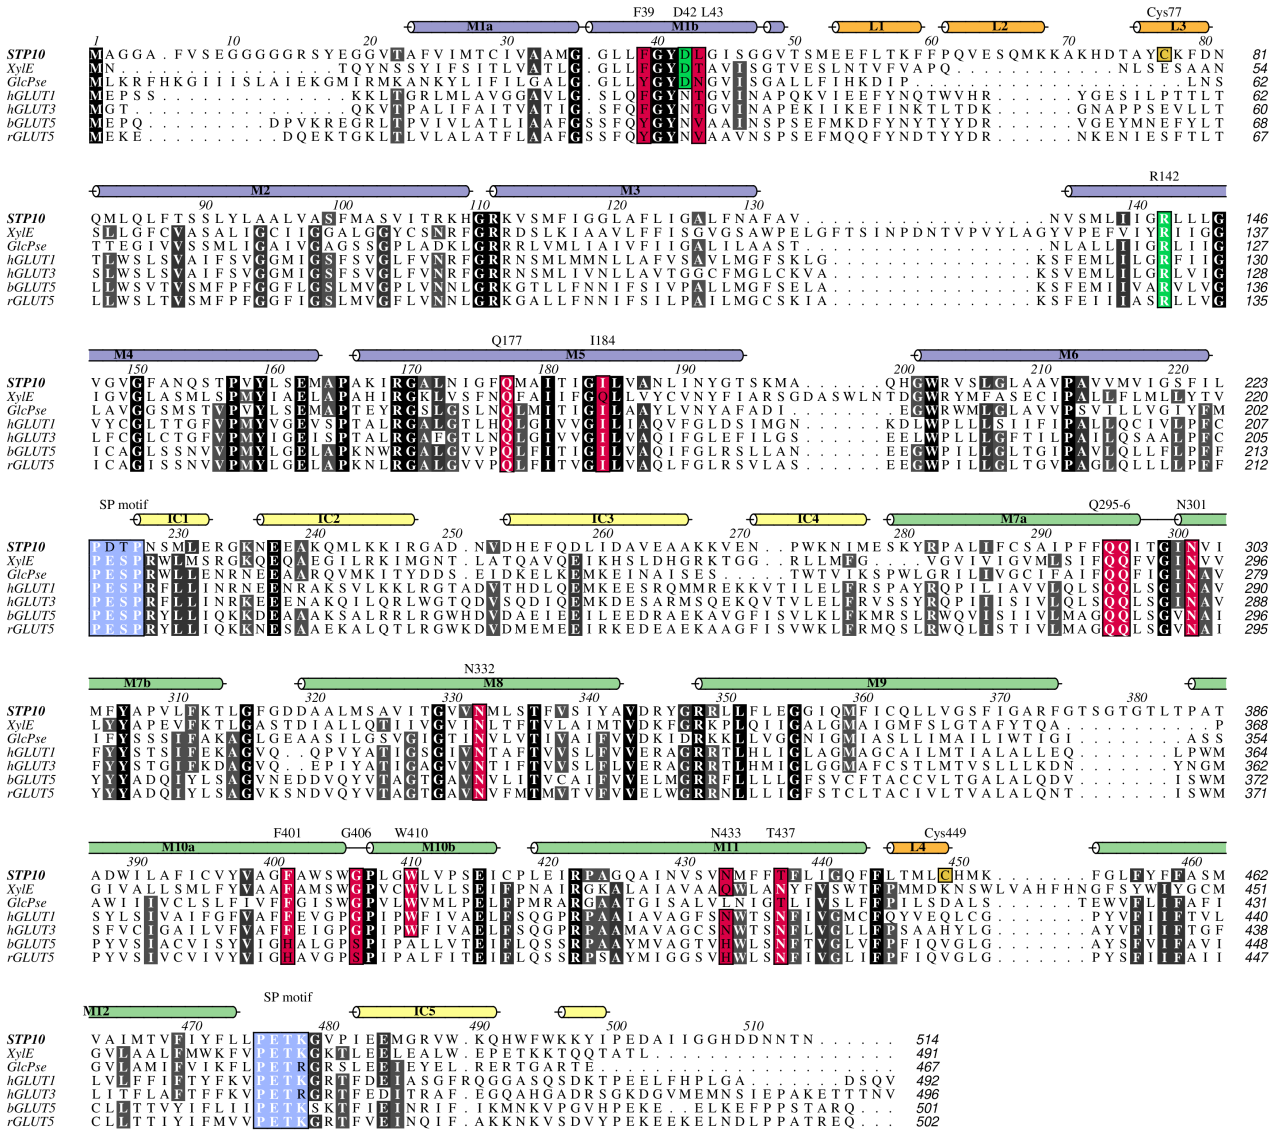

**Supplementary Figure 2. Multiple sequence alignment of the *A. thaliana* STP10 with other Major Facilitator sugar transporters from the Sugar Porter group.** Alignment between STP10 (accession number Q9LT15), XyleE (accession number P0AGF4), GlcPse (accession number A0A0H2VG78), hGLUT1 (accession number P11166), hGLUT3 (accession number P11169), bGLUT5 (accession number P58353), rGLUT5 (accession number P43427). Conserved residues are highlighted with gray-scale, where black is perfectly conserved. Colored tubes represent  $\alpha$ -helices found in the N domain (blue), Lid domain (orange), ICH domain (pale yellow) and C domain (green). Key residues are numbered above the  $\alpha$ -helix markings. Residues highlighted in dark red participate in sugar binding. The proton donor/acceptor pair is highlighted in green. The cysteines forming the disulfide bridge between Lid domain and C domain are highlighted in dark yellow. Conserved motifs are highlighted in light blue.



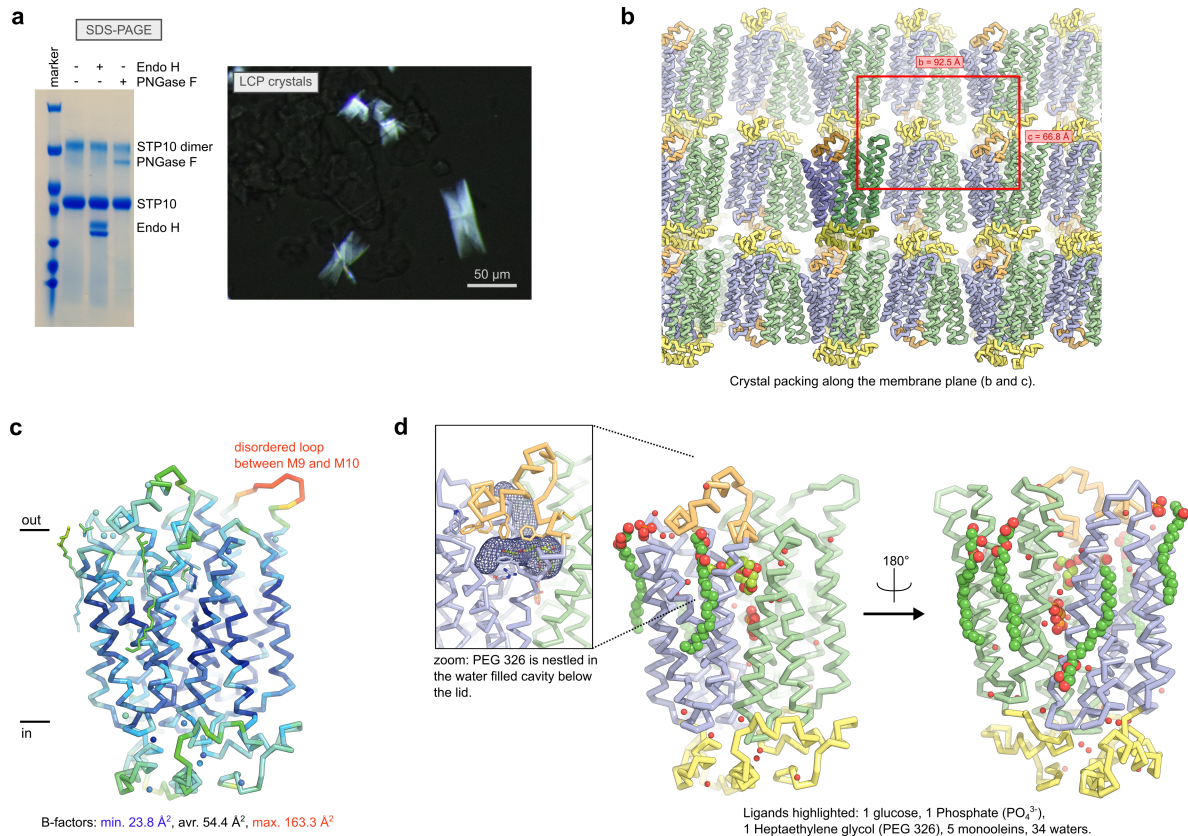

**Supplementary Figure 3. Crystals and components of the asymmetric unit.** **a**, SDS-PAGE gel of STP10 and polarized light photo of STP10 crystals. STP10 has a predicted glycosylation site at Asn134. While the crystal packing would allow the presence of glycosylation no density was observed, and incubating the STP10 sample over night with Endo H or PNGase F did not result in a mass-shift, indicating that STP10 is not glycosylated when overexpressed in yeast. **b**, Asymmetric unit and crystal packing of STP10. The unit cell is viewed perpendicular to the bc-plane, and the b and c axis highlighted in red. The asymmetric unit contains one molecule of STP10, as highlighted in darker colors. The packing is a nice example of type I packing normally obtained by LCP crystallography with the transmembrane regions packing in a lipid bilayer and a relatively low solvent content (54%). **c**, The backbone of STP10 colored by the atomic displacement factor (B-factor) with a rainbow gradient from low/blue (23.8 Å<sup>2</sup>) to high/red (163.3 Å<sup>2</sup>). There is a disordered loop between M9 and M10 with a significantly higher B-factor than the rest of the model. **d**, Backbone representation of STP10 with all the heterologous molecules found in the density highlighted. Besides STP10 we could confidently build 1 glucose, 1 phosphate, 1 PEG 326, 5 monoolein molecules and 34 waters.

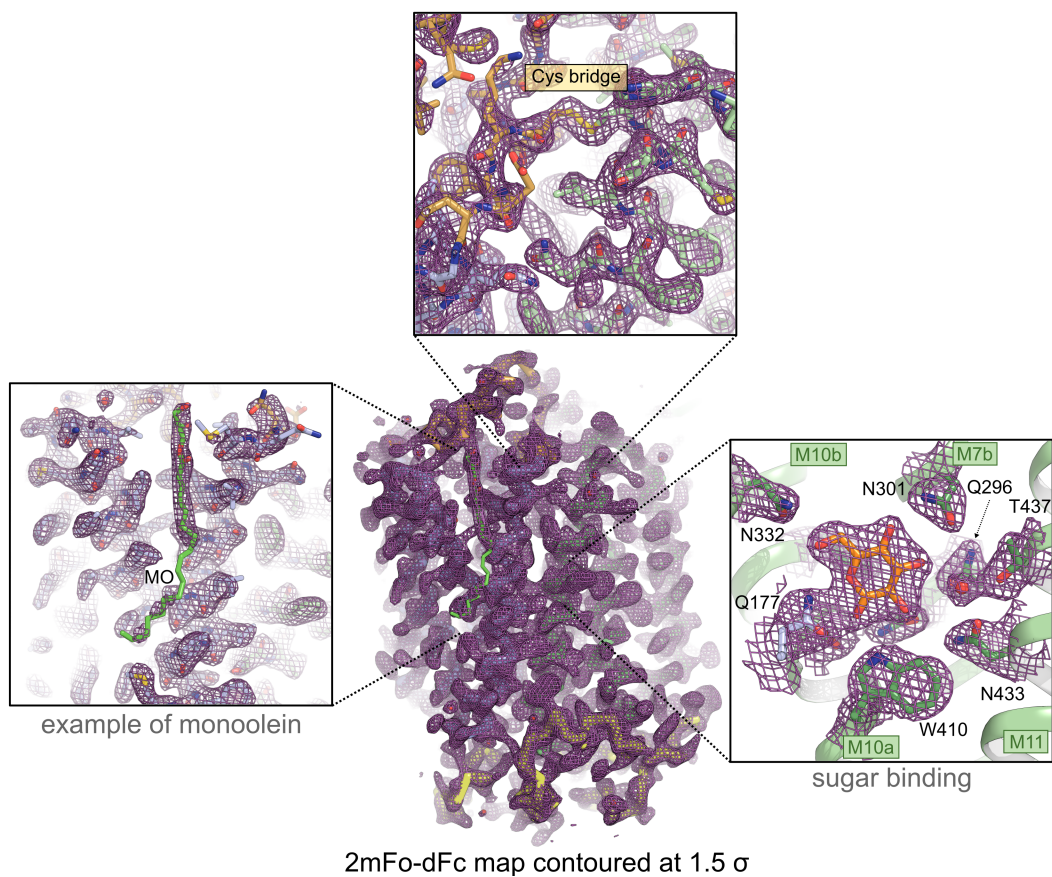

**Supplementary Figure 4. Examples of electron density.** 2mFo-DFc electron density calculated after the final refinement run (1.5  $\sigma$ ) in magenta with the final model overlaid. The three inserts highlight the high quality of the electron density for glucose binding and the disulfide bridge and an example of the density of the monoolein, which was weaker and is clearer at lower sigma levels than 1.5.

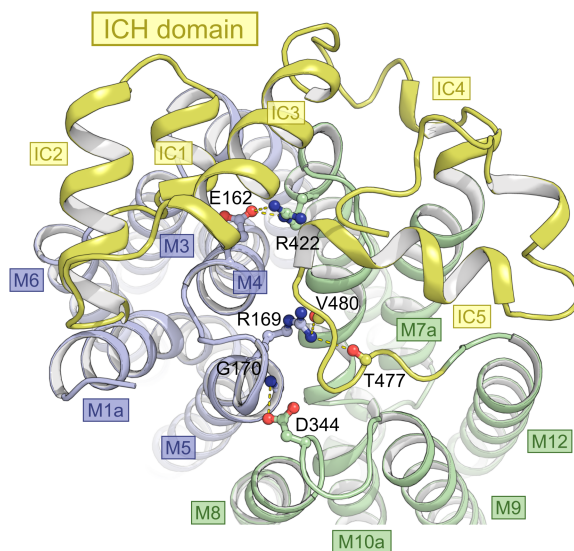

View from cytosolic side

**Supplementary Figure 5. Closure towards the cytosolic side in STP10.** View of STP10 from the cytosolic side. The opening between the N and C domain towards the cytosolic is closed and held in place by several highlighted interactions between the two domains. In particular by a double salt bridge from D344(M8) to the main chain nitrogen of Gly170(M5), and from Arg169(M5) to the main chain carbonyls of Thr477 and Val480, as well as a salt bridge from Glu162 (M4) to Arg422(M11). These regions are perfectly conserved in all STPs and several bacterial symporters (Supplementary Figure 2), and have also been observed in human sugar facilitators.

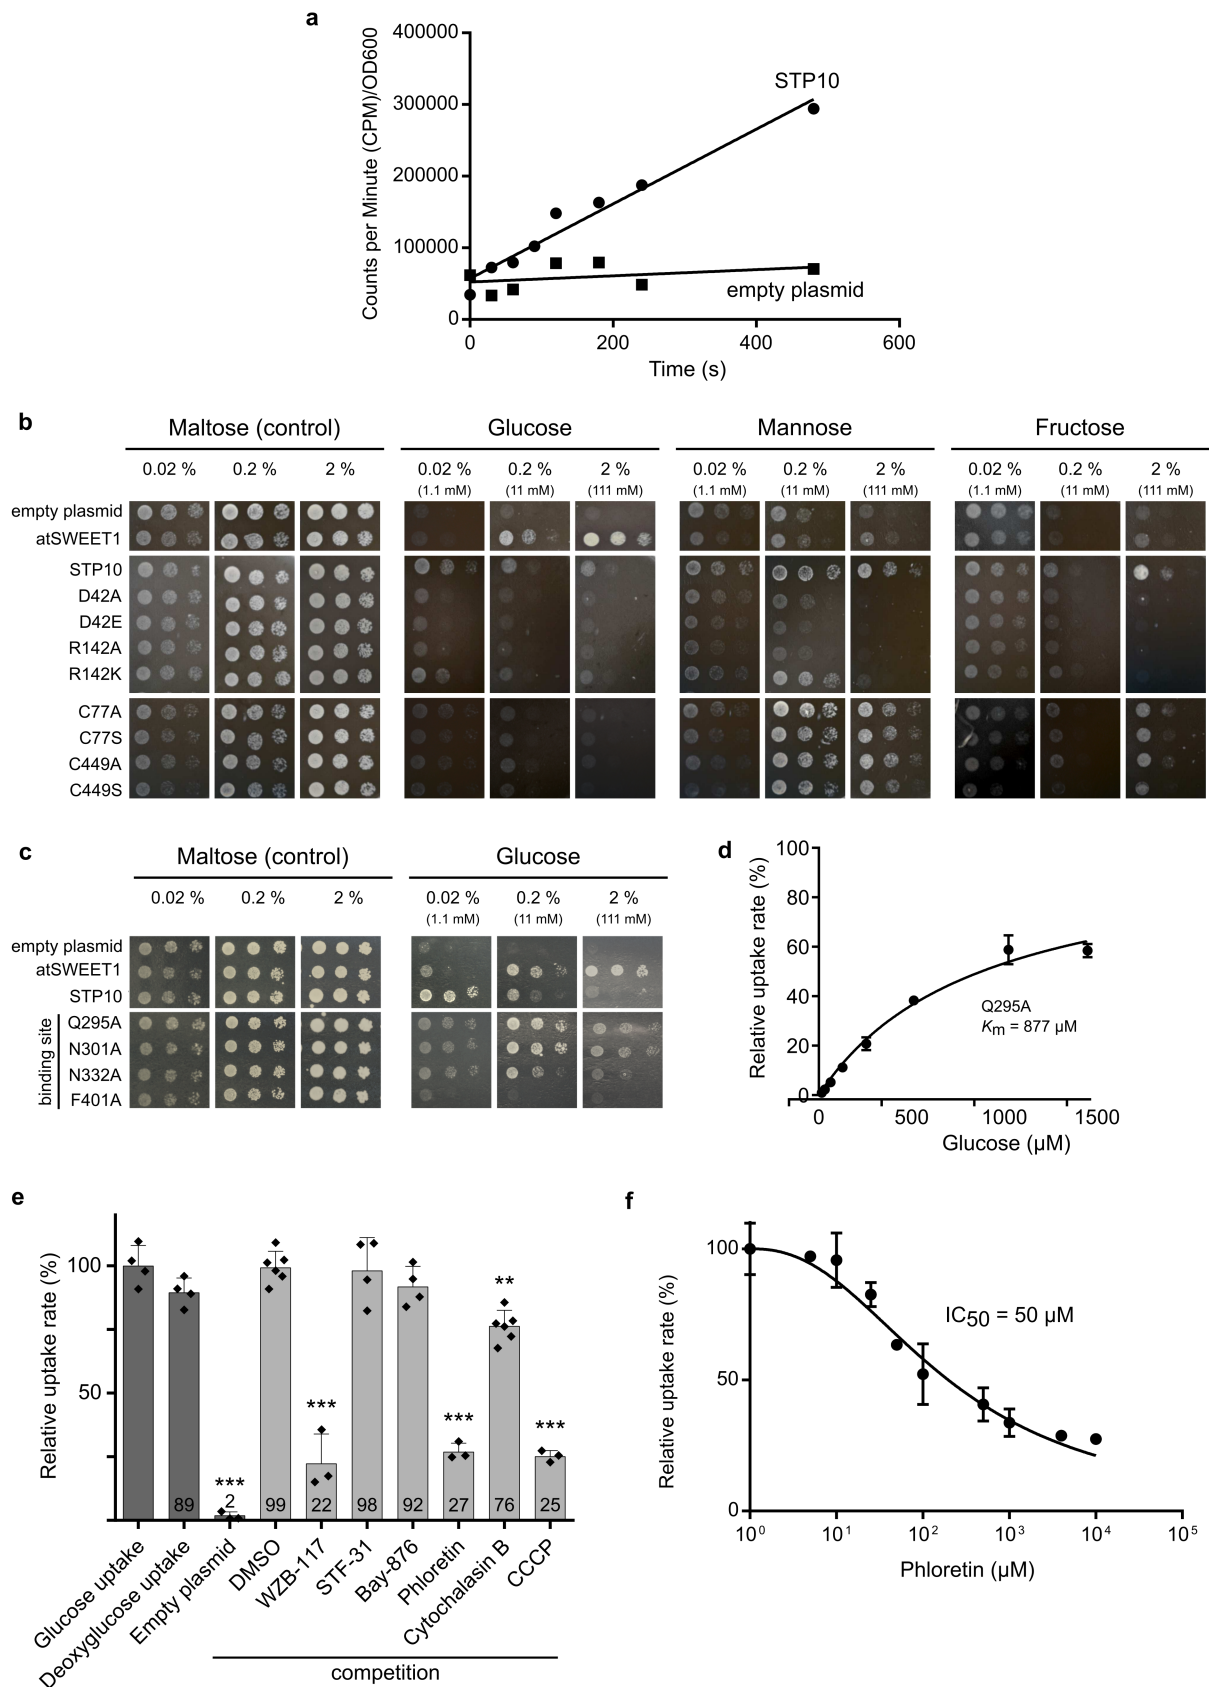

**Supplementary Figure 6. Functional characterization of STP10.** **a**, Uptake of glucose into EBY.VW4000 yeast strain expressing STP10 (circles) or empty plasmid (squares) per OD600 of cells at an initial outside concentration of 100  $\mu\text{M}$  glucose at pH 5.0. **b**, Growth complementation of the *S. cerevisiae* hexose transport deficient strain, EBY.VW4000 by STP10, STP10 mutants and

*Arabidopsis thaliana* SWEET1 (positive control for glucose uptake) at different concentrations of sugars. **c**, Growth complementation of EBY.VW4000 by STP10 substrate binding site mutants. **d**, Determination of kinetic parameters for the transport of glucose measured using the EBY.VW4000 uptake assay for the mutant Q295A. Shown is a Michaelis-Menten fit to glucose titration. Data are mean  $\pm$  SD of three or more replicate experiments. **e**, STP10 inhibition determined by the EBY.VW4000 competition assay at pH 5.0. \*,  $P \leq 0.05$ ; \*\*,  $P \leq 0.01$ ; and \*\*\*,  $P \leq 0.001$  by Student's *t* test. **f**, Dose response curve showing inhibition of STP10 activity by Phloretin. Data for all assays are mean  $\pm$  SD of three or more replicate experiments.



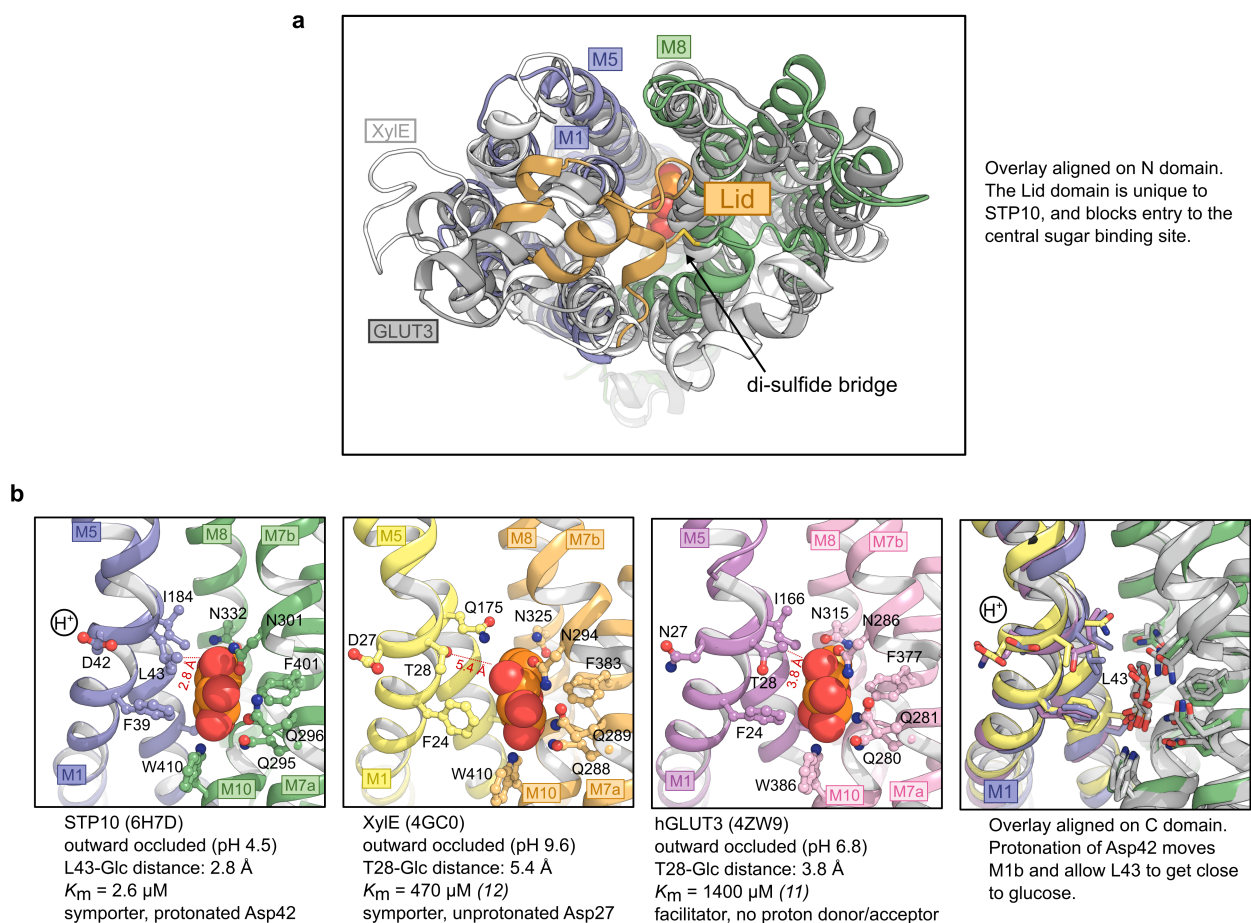

**Supplementary Figure 7. Comparison of STP10 with XylE and hGLUT3.** **a**, Overlay of the extracellular region in STP10, XylE and hGLUT3 (All in outward occluded conformations).

**b**, Comparison of the sugar binding sites in STP10, XylE and hGLUT3. All the polar interactions from the C domain are identical in the three cases, despite large differences in affinity. Differences are found in the N domain. In particular, the hydrophobic interaction between substrate and L43 in STP10 is replaced by a polar interaction from a Serine in XylE and Glut3. Only in STP10 is the proton donor/acceptor residue (Asp42) protonated, causing the M1 helix to bend away from Arg142 and move Leu43 towards the substrate.

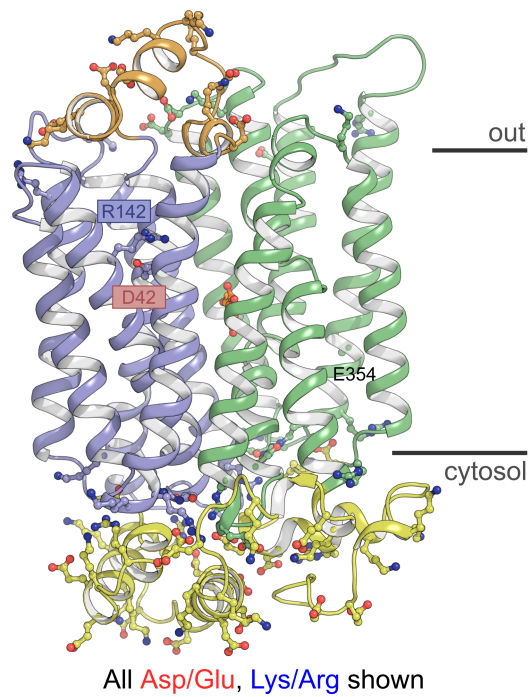

**Supplementary Figure 8. Identification of all charged residues in STP10.** STP10 is shown in cartoon with all charged residues shown as sticks. Asp/Glu are red while Lys/Arg are blue. Only Asp42 and Arg142 are buried in the membrane plane and in position to form the proton donor/acceptor pair. There is a Glu354 that is also in the membrane and pointing towards the solvent. It is highly unlikely that this residues (that is not conserved in STPs), would have a functional role, but it might be implicated in determining the energy landscape of conformational change.

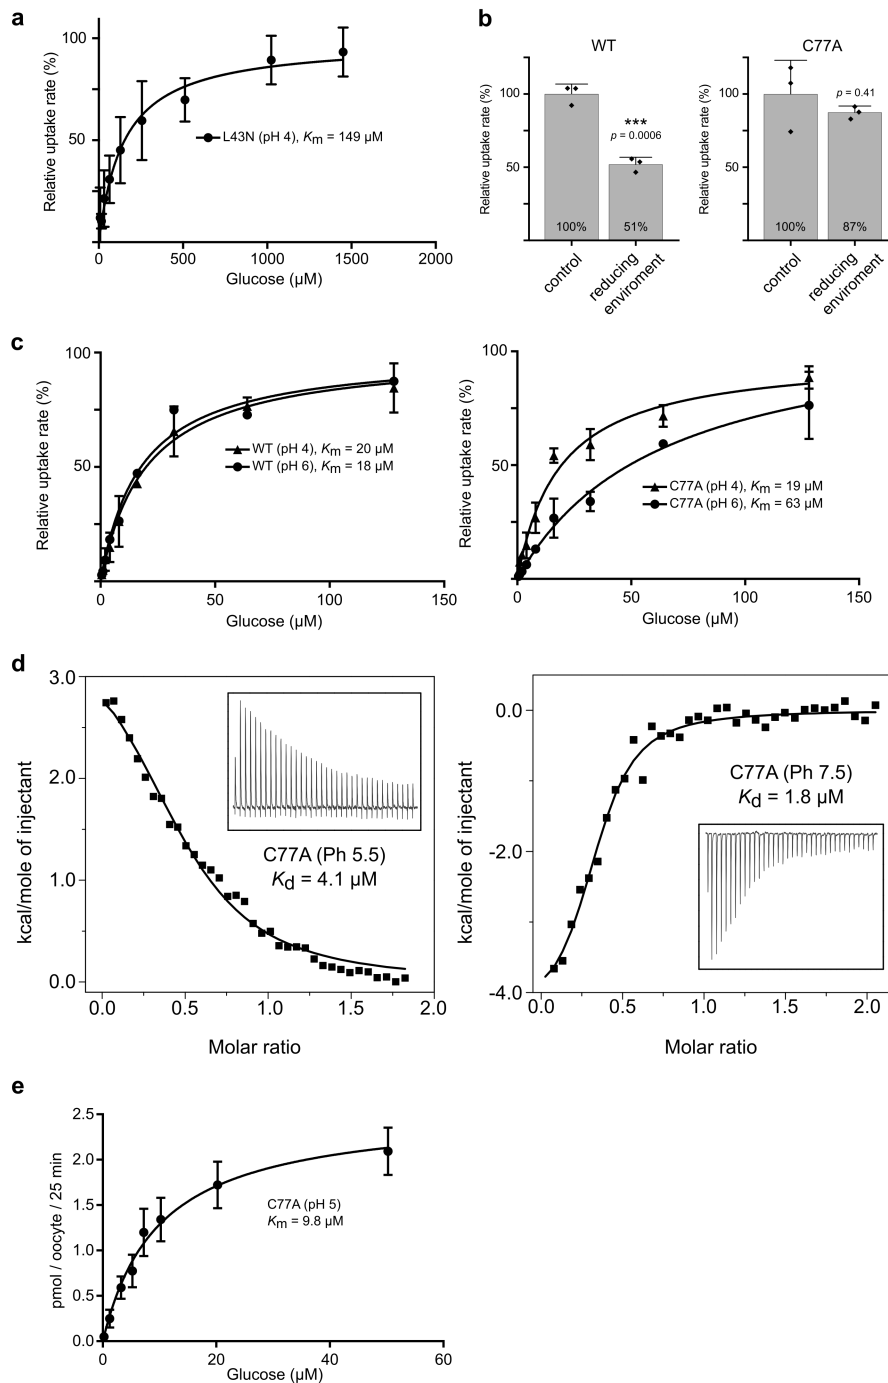

**Supplementary Figure 9. Functional characterization of STP10 mutants L43N and C77A. a**, Michaelis-Menten fit to glucose titration of STP10 mutant L43A at pH 4. **b**, Effect of reducing agent on glucose transport using the EB.Y.VW4000 uptake assay for WT and C77A. The uptake assay was done at pH 6.0 either under standard conditions or in a reducing environment (by addition of 2.5% (V/V) 2-Mercaptoethanol). \*\*\*,  $P \leq 0.001$  by Student's  $t$  test. **c**, Determination of kinetic parameters for the transport of glucose measured using the EB.Y.VW4000 uptake assay. Shown is a Michaelis-Menten fit to glucose titration at pH 4 and pH 6 (left) and for the mutant C77A at pH 4 and pH 6 (right). Data are mean  $\pm$  SD of three or more replicate experiments. **d**, The

binding affinity between glucose and STP10-C77A was measured with Isothermal titration calorimetry at pH 5.5 and at pH 7.5. The apparent  $K_d$  does not change with pH. e, Determination of kinetic parameters for the transport of glucose by STP10 C77A measured using the *Xenopus* oocyte uptake assay at pH 5. Shown is a Michaelis-Menten fit to glucose titration. Data for all assays are mean  $\pm$  SD of three or more replicate experiments.

**Supplementary Table 1. Sequence identity of STP10 to the *A. thaliana* Sugar Transport Family.**

| <b>Name</b> | <b>Sequence %ID (Needle-Wunsch alignment)</b> |
|-------------|-----------------------------------------------|
| STP1        | 59.4%                                         |
| STP2        | 50.5%                                         |
| STP3        | 46.5%                                         |
| STP4        | 64.6%                                         |
| STP5        | 48.2%                                         |
| STP6        | 52.4%                                         |
| STP7        | 53.7%                                         |
| STP8        | 51.9%                                         |
| STP9        | 84.3%                                         |
| STP11       | 70.8%                                         |
| STP12       | 60.5%                                         |
| STP13       | 52.8%                                         |
| STP14       | 50.7%                                         |



**Supplementary Table 2. Sequence identity and Root Mean Square Deviation of STP10 to structures from the Sugar Porter group.**

| Name   | PDB code | Sequence %ID<br>(Needle-Wunsch alignment) | RMSD (Å)<br>(all-atom fit to STP10) |
|--------|----------|-------------------------------------------|-------------------------------------|
| XylE   | 4GC0     | 27.1%                                     | 1.86                                |
| XylE   | 4JA3     | 27.1%                                     | 2.71                                |
| XylE   | 4JA4     | 27.1%                                     | 3.04                                |
| XylE   | 4QIQ     | 27.1%                                     | 2.93                                |
| GlcPse | 4LDS     | 27.8%                                     | 3.31                                |
| hGLUT1 | 4PYP     | 23.4%                                     | 3.50                                |
| hGLUT3 | 4ZWC     | 25.2%                                     | 1.89                                |
| hGLUT3 | 4ZW9     | 25.2%                                     | 1.83                                |
| bGLUT5 | 4YB9     | 24.0%                                     | 3.34                                |
| rGLUT5 | 4YBQ     | 26.0%                                     | 2.12                                |

**Supplementary Table 3. Data collection and refinement statistics**

| STP10:Glucose                      |                        |
|------------------------------------|------------------------|
| <b>Data collection</b>             |                        |
| Space group                        | P 2 <sub>1</sub> (#4)  |
| No of crystals merged              | 2                      |
| Cell dimensions                    |                        |
| <i>a</i> , <i>b</i> , <i>c</i> (Å) | 51.7, 92.5, 66.8       |
| $\alpha$ , $\beta$ , $\gamma$ (°)  | 90.0, 109.4, 90.0      |
| Resolution (Å)                     | 63 - 2.4 (2.5 - 2.4) * |
| <i>R</i> <sub>meas</sub> (%)       | 30.6 (234.3)           |
| <i>I</i> / $\sigma I$              | 4.9 (0.9)              |
| CC(1/2) (%)                        | 99.1 (34.8)            |
| Completeness (%)                   | 99.8 (99.8)            |
| Redundancy                         | 6.6 (6.6)              |
| <b>Refinement</b>                  |                        |
| Resolution (Å)                     | 63 - 2.4 (2.51 - 2.4)  |
| No. reflections (work/free)        | 22,078 / 1,162         |
| <i>R</i> <sub>work</sub>           | 20.3 (31.7)            |
| <i>R</i> <sub>free</sub>           | 26.8 (36.6)            |
| No. atoms                          |                        |
| Protein                            | 3,771                  |
| Ligand/ion                         | 164                    |
| Water                              | 34                     |
| <i>B</i> -factors                  |                        |
| Protein                            | 53.9                   |
| Ligand/ion                         | 68.7                   |
| Water                              | 46.4                   |
| R.m.s. deviations                  |                        |
| Bond lengths (Å)                   | 0.01                   |
| Bond angles (°)                    | 1.01                   |
| Ramachandran plot                  |                        |
| Favored (%)                        | 95.7                   |
| Outliers (%)                       | 0.0                    |
| Rotamer outliers (%)               | 0.25                   |
| Clashscore                         | 10.38                  |
| Molprobity score                   | 1.84                   |

\*Values in parentheses are for highest-resolution shell.
